# Supplementary material for: Assessing the relationship between agency and peer violence among adolescents aged 10 to 14 years in Kinshasa, Democratic Republic of Congo and Blantyre, Malawi: A cross-sectional study
Source: PubMed Central journal article supplement (PMC8716028; doi:10.1371/journal.pmed.1003552), 2021-12-13
Supplement: pmed.1003552.s010.pdf [file pmed.1003552.s010.pdf]

```

name: <unnamed>
log: /Users/akramaiya/Dropbox/Personal Work/GEAS/GEAS Empowerment Working Group/Empowerment and Violence Perpetration & Victimization/PLoS Medicine
> /Revise and Resubmit - 3/codebook.smcl
log type: smcl
opened on: 19 Nov 2021, 16:41:57

```

1 . codebook

---

**ialage** **IA1. How old are you?**

---

```

type: numeric (byte)
range: [10,14]          units: 1
unique values: 5        missing .: 0/4,536

tabulation: Freq. Value
             770 10
             988 11
             1,116 12
             981 13
             681 14

```

---

**ia2gender** **IA2. Are you a ...?**

---

```

type: numeric (byte)
label: ia2gender
range: [0,1]           units: 1
unique values: 2       missing .: 0/4,536

tabulation: Freq. Numeric Label
             2,218      0 Boy
             2,318      1 Girl

```

---

**va2a** **Damaging property**

---

```

type: numeric (int)
label: va2a
range: [1,4]          units: 1
unique values: 4      missing .: 357/4,536

tabulation: Freq. Numeric Label
             254      1 Not likely at all
             604      2 Not very likely
             795      3 Somewhat likely
             2,526    4 Very likely
             357      .

```

---

**va2b** **Spraying paint on walls (Graffiti)**

---

```

type: numeric (int)
label: va2b
range: [1,4]          units: 1
unique values: 4      missing .: 275/4,536

tabulation: Freq. Numeric Label
             259      1 Not likely at all
             448      2 Not very likely
             814      3 Somewhat likely
             2,740    4 Very likely
             275      .

```

---

**va2c** **Bullying or threatening another person**

---

```

type: numeric (int)
label: va2c
range: [1,4]          units: 1
unique values: 4      missing .: 224/4,536

tabulation: Freq. Numeric Label
             274      1 Not likely at all
             488      2 Not very likely
             883      3 Somewhat likely
             2,667    4 Very likely
             224      .

```

---

**va2d** **Fighting with another person**

---

```

type: numeric (int)
label: va2d
range: [1,4]          units: 1
unique values: 4      missing .: 151/4,536

tabulation: Freq. Numeric Label
             245      1 Not likely at all
             525      2 Not very likely
             799      3 Somewhat likely
             2,816    4 Very likely
             151      .

```

---

**ixb1a** **Have you ever been scared or felt really bad because grown-ups called you names,**

---

```

type: numeric (int)
label: ixb1a
range: [1,999]        units: 1
unique values: 4      missing .: 29/4,536

tabulation: Freq. Numeric Label
             2,672      1 Never
             1,222      2 Sometimes
             501        3 Often
             112        999 Don't know
             29         .

```

---

**ixb1b** **Have you ever been scared that your parents or other adults were going to hurt y**

---

```

type: numeric (int)
label: ixb1b
range: [1,999]        units: 1
unique values: 4      missing .: 36/4,536

tabulation: Freq. Numeric Label
             3,369      1 Never
             777        2 Sometimes
             212        3 Often
             142        999 Don't know
             36         .

```

---

**ixb1c** **Have you ever felt like you are not loved or cared about?**

---

```

type: numeric (int)
label: ixb1c
range: [1,999]        units: 1
unique values: 4      missing .: 32/4,536

tabulation: Freq. Numeric Label
             3,636      1 Never
             511        2 Sometimes

```

220 3 Often  
137 999 Don't know  
32 .

---

**ixblid** Have you ever felt like you have no one that protects you?

---

type: numeric (int)  
label: **ixblid**  
range: [1,999] units: 1  
unique values: 4 missing .: 39/4,536

| tabulation: | Freq. | Numeric | Label      |
|-------------|-------|---------|------------|
|             | 3,648 | 1       | Never      |
|             | 436   | 2       | Sometimes  |
|             | 268   | 3       | Often      |
|             | 145   | 999     | Don't know |
|             | 39    | .       | .          |

---

**ixble** Has there ever been a time of your life when you were totally on your own and ha

---

type: numeric (int)  
label: **ixble**  
range: [1,999] units: 1  
unique values: 4 missing .: 31/4,536

| tabulation: | Freq. | Numeric | Label      |
|-------------|-------|---------|------------|
|             | 3,764 | 1       | Never      |
|             | 469   | 2       | Sometimes  |
|             | 174   | 3       | Often      |
|             | 98    | 999     | Don't know |
|             | 31    | .       | .          |

---

**ixblf** Have your parents/guardians ever drunk too much alcohol or used drugs so they ca

---

type: numeric (int)  
label: **ixblf**  
range: [1,999] units: 1  
unique values: 4 missing .: 32/4,536

| tabulation: | Freq. | Numeric | Label      |
|-------------|-------|---------|------------|
|             | 4,048 | 1       | Never      |
|             | 238   | 2       | Sometimes  |
|             | 99    | 3       | Often      |
|             | 119   | 999     | Don't know |
|             | 32    | .       | .          |

---

**ixblg** Has there ever been a time when your family did not have enough food because the

---

type: numeric (int)  
label: **ixblg**  
range: [1,999] units: 1  
unique values: 4 missing .: 23/4,536

| tabulation: | Freq. | Numeric | Label      |
|-------------|-------|---------|------------|
|             | 2,579 | 1       | Never      |
|             | 1,433 | 2       | Sometimes  |
|             | 412   | 3       | Often      |
|             | 89    | 999     | Don't know |
|             | 23    | .       | .          |

---

**ixblh** Have you ever seen your mom being hit, beaten or threatened?

---

type: numeric (int)  
label: **ixblh**  
range: [1,999] units: 1  
unique values: 4 missing .: 31/4,536

| tabulation: | Freq. | Numeric | Label      |
|-------------|-------|---------|------------|
|             | 3,501 | 1       | Never      |
|             | 717   | 2       | Sometimes  |
|             | 171   | 3       | Often      |
|             | 116   | 999     | Don't know |
|             | 31    | .       | .          |

---

**ixbli** Have you ever seen your mother or father so sad that they couldn't take care of

---

type: numeric (int)  
label: **ixbli**  
range: [1,999] units: 1  
unique values: 4 missing .: 34/4,536

| tabulation: | Freq. | Numeric | Label      |
|-------------|-------|---------|------------|
|             | 3,663 | 1       | Never      |
|             | 566   | 2       | Sometimes  |
|             | 159   | 3       | Often      |
|             | 114   | 999     | Don't know |
|             | 34    | .       | .          |

---

**ixblj** Have any of your parents ever been in prison/jail?

---

type: numeric (int)  
label: **ixblj**  
range: [1,999] units: 1  
unique values: 4 missing .: 26/4,536

| tabulation: | Freq. | Numeric | Label      |
|-------------|-------|---------|------------|
|             | 3,884 | 1       | Never      |
|             | 443   | 2       | Sometimes  |
|             | 55    | 3       | Often      |
|             | 128   | 999     | Don't know |
|             | 26    | .       | .          |

---

**ixblk** Has your family ever been forced to leave your home/house?

---

type: numeric (int)  
label: **ixblk**  
range: [1,999] units: 1  
unique values: 4 missing .: 34/4,536

| tabulation: | Freq. | Numeric | Label      |
|-------------|-------|---------|------------|
|             | 3,895 | 1       | Never      |
|             | 378   | 2       | Sometimes  |
|             | 104   | 3       | Often      |
|             | 125   | 999     | Don't know |
|             | 34    | .       | .          |

---

**ixbll** Has an adult ever touched you in your private parts except when being bathed?

---

type: numeric (int)  
label: **ixbll**  
range: [1,999] units: 1  
unique values: 4 missing .: 40/4,536

| tabulation: | Freq. | Numeric | Label     |
|-------------|-------|---------|-----------|
|             | 4,198 | 1       | Never     |
|             | 182   | 2       | Sometimes |
|             | 52    | 3       | Often     |

64 999 Don't know  
40 .

---

**ixblm** Has an adult ever attempted or forced you to have sexual intercourse?

---

type: numeric (int)  
label: ixblm  
range: [1,999] units: 1  
unique values: 4 missing.: 31/4,536

| tabulation: | Freq. | Numeric | Label      |
|-------------|-------|---------|------------|
|             | 4,267 | 1       | Never      |
|             | 146   | 2       | Sometimes  |
|             | 35    | 3       | Often      |
|             | 57    | 999     | Don't know |
|             | 31    | .       | .          |

---

**ixcl0** IXC10. During the last 6 months, have you ever been slapped, hit or otherwise ph

---

type: numeric (int)  
label: ixcl0  
range: [1,999] units: 1  
unique values: 5 missing.: 17/4,536

| tabulation: | Freq. | Numeric | Label                       |
|-------------|-------|---------|-----------------------------|
|             | 3,197 | 1       | No                          |
|             | 213   | 2       | Yes, by both boys and girls |
|             | 563   | 3       | Yes, by a boy or boys       |
|             | 500   | 4       | Yes, by a girl or girls     |
|             | 46    | 999     | Don't know                  |
|             | 17    | .       | .                           |

---

**ixcl2** IXC12. During the last 6 months, have you slapped, hit or otherwise physically hu

---

type: numeric (int)  
label: ixcl2  
range: [1,999] units: 1  
unique values: 5 missing.: 18/4,536

| tabulation: | Freq. | Numeric | Label                    |
|-------------|-------|---------|--------------------------|
|             | 3,334 | 1       | No                       |
|             | 229   | 2       | Yes, both boys and girls |
|             | 456   | 3       | Yes, a boy or boys       |
|             | 436   | 4       | Yes, a girl or girls     |
|             | 63    | 999     | Don't know               |
|             | 18    | .       | .                        |

---

**meanscore\_fom** Freedom of Movement

---

type: numeric (float)  
range: [1,4] units: 1.000e-07  
unique values: 31 missing.: 28/4,536

mean: 1.71627  
std. dev: .760325

| percentiles: | 10% | 25% | 50% | 75% | 90% |
|--------------|-----|-----|-----|-----|-----|
|              | 1   | 1   | 1.6 | 2.2 | 2.8 |

---

**meanscore\_voice** Voice

---

type: numeric (float)  
range: [1,4] units: 1.000e-07  
unique values: 55 missing.: 20/4,536

mean: 2.61619  
std. dev: .746032

| percentiles: | 10% | 25% | 50%     | 75%     | 90%     |
|--------------|-----|-----|---------|---------|---------|
|              | 1.6 | 2   | 2.66667 | 3.14286 | 3.57143 |

---

**meanscore\_decision** Decision-making

---

type: numeric (float)  
range: [1,4] units: 1.000e-07  
unique values: 19 missing.: 33/4,536

mean: 2.76721  
std. dev: .869571

| percentiles: | 10% | 25% | 50% | 75% | 90% |
|--------------|-----|-----|-----|-----|-----|
|              | 1.5 | 2   | 3   | 3.5 | 4   |

---

**education** Age-for-grade Educational Attainment

---

type: numeric (float)  
label: education  
range: [0,2] units: 1  
unique values: 3 missing.: 1/4,536

| tabulation: | Freq. | Numeric | Label                         |
|-------------|-------|---------|-------------------------------|
|             | 826   | 0       | Out of school                 |
|             | 1,517 | 1       | Lower than age expected grade |
|             | 2,192 | 2       | Age expected grade or higher  |
|             | 1     | .       | .                             |

---

**quintile** Family Wealth Index

---

type: numeric (byte)  
label: quintile  
range: [1,5] units: 1  
unique values: 5 missing.: 1,717/4,536

| tabulation: | Freq. | Numeric | Label                |
|-------------|-------|---------|----------------------|
|             | 587   | 1       | Bottom 20 percentile |
|             | 594   | 2       | 20-40 percentile     |
|             | 530   | 3       | 40-60 percentile     |
|             | 563   | 4       | 60-80 percentile     |
|             | 545   | 5       | Top 20 percentile    |
|             | 1,717 | .       | .                    |

---

**parent\_close** Feels close to caregiver (a lot)

---

type: numeric (float)  
label: parent\_close  
range: [0,1] units: 1  
unique values: 2 missing.: 111/4,536

| tabulation: | Freq. | Numeric | Label      |
|-------------|-------|---------|------------|
|             | 1,493 | 0       | No         |
|             | 2,932 | 1       | Yes, a lot |
|             | 111   | .       | .          |

---

**time\_friends** Weekly Socialization with Friends

---

```

type: numeric (float)
label: time_friends

range: [0,3]          units: 1
unique values: 4      missing .: 1,822/4,536

tabulation: Freq.  Numeric  Label
             52       0      Never/less than 1 day
             634      1      1-2 days
             616      2      3-4 days
             1,412    3      Nearly every day
             1,822    .

```

---

**friend\_sex\_combo** Friend Sex Structure


---

```

type: numeric (float)
label: friend_sex_combo

range: [0,2]          units: 1
unique values: 3      missing .: 171/4,536

tabulation: Freq.  Numeric  Label
             172      0      No friends
             1,913    1      Same-sex friends only
             2,280    2      Any opposite-sex friends
             171      .

```

---

**ixblar** Have you ever been scared or felt really bad because grown-ups called you names,


---

```

type: numeric (float)

range: [0,1]          units: 1
unique values: 2      missing .: 141/4,536

tabulation: Freq.  Value
             2,672  0
             1,723  1
             141    .

```

---

**ixblbr** Have you ever been scared that your parents or other adults were going to hurt y


---

```

type: numeric (float)

range: [0,1]          units: 1
unique values: 2      missing .: 178/4,536

tabulation: Freq.  Value
             3,369  0
             989   1
             178   .

```

---

**ixblcr** Have you ever felt like you are not loved or cared about?


---

```

type: numeric (float)

range: [0,1]          units: 1
unique values: 2      missing .: 169/4,536

tabulation: Freq.  Value
             3,636  0
             731   1
             169   .

```

---

**ixbldr** Have you ever felt like you have no one that protects you?


---

```

type: numeric (float)

range: [0,1]          units: 1
unique values: 2      missing .: 184/4,536

tabulation: Freq.  Value
             3,648  0
             704   1
             184   .

```

---

**ixbler** Has there ever been a time of your life when you were totally on your own and ha


---

```

type: numeric (float)

range: [0,1]          units: 1
unique values: 2      missing .: 129/4,536

tabulation: Freq.  Value
             3,764  0
             643   1
             129   .

```

---

**ixblfr** Have your parents/guardians ever drunk too much alcohol or used drugs so they ca


---

```

type: numeric (float)

range: [0,1]          units: 1
unique values: 2      missing .: 151/4,536

tabulation: Freq.  Value
             4,048  0
             337   1
             151   .

```

---

**ixblgr** Has there ever been a time when your family did not have enough food because the


---

```

type: numeric (float)

range: [0,1]          units: 1
unique values: 2      missing .: 112/4,536

tabulation: Freq.  Value
             2,579  0
             1,845  1
             112   .

```

---

**ixblhr** Have you ever seen your mom being hit, beaten or threatened?


---

```

type: numeric (float)

range: [0,1]          units: 1
unique values: 2      missing .: 147/4,536

tabulation: Freq.  Value
             3,501  0
             888   1
             147   .

```

---

**ixbliir** Have you ever seen your mother or father so sad that they couldn't take care of


---

```

type: numeric (float)

range: [0,1]          units: 1
unique values: 2      missing .: 148/4,536

tabulation: Freq.  Value
             3,663  0
             725   1
             148   .

```

---

**ixbljr** Have any of your parents ever been in prison/jail?

---

```

type: numeric (float)
range: [0,1]           units: 1
unique values: 2       missing .: 154/4,536

tabulation: Freq. Value
3,884  0
498    1
154    .

```

---



---

**ixblkr** Has your family ever been forced to leave your home/house?

---

```

type: numeric (float)
range: [0,1]           units: 1
unique values: 2       missing .: 159/4,536

tabulation: Freq. Value
3,895  0
482    1
159    .

```

---



---

**ixbllr** Has an adult ever touched you in your private parts except when being bathed?

---

```

type: numeric (float)
range: [0,1]           units: 1
unique values: 2       missing .: 104/4,536

tabulation: Freq. Value
4,198  0
234    1
104    .

```

---



---

**ixblmr** Has an adult ever attempted or forced you to have sexual intercourse?

---

```

type: numeric (float)
range: [0,1]           units: 1
unique values: 2       missing .: 88/4,536

tabulation: Freq. Value
4,267  0
181    1
88     .

```

---



---

**meanscore\_sds** SDS mean score

---

```

type: numeric (float)
range: [1,5]           units: 1.000e-07
unique values: 43      missing .: 5/4,536

mean: 4.12597
std. dev: 1.05005

percentiles: 10% 25% 50% 75% 90%
2.5 3.66667 4.5 5 5

```

---



---

**meanscore\_gst** GST mean score

---

```

type: numeric (float)
range: [1,5]           units: 1.000e-07
unique values: 59      missing .: 7/4,536

mean: 4.3527
std. dev: .729619

percentiles: 10% 25% 50% 75% 90%
3.28571 4 4.5 5 5

```

---



---

**study\_site2** Study site

---

```

type: numeric (float)
label: study_site2

range: [1,2]           units: 1
unique values: 2       missing .: 0/4,536

tabulation: Freq. Numeric Label
2,842      1 Kinshasa, DRC
1,694      2 Blantyre, Malawi

```

---



---

**parent3** parental structure grandparent other together

---

```

type: numeric (float)
label: parent3

range: [0,2]           units: 1
unique values: 3       missing .: 35/4,536

tabulation: Freq. Numeric Label
2,207      0 both parents
1,747      1 single parent
547        2 grandparent/other
35         .

```

---



---

**parent\_awareness2** parental awareness

---

```

type: numeric (float)
label: noyes

range: [0,1]           units: 1
unique values: 2       missing .: 0/4,536

tabulation: Freq. Numeric Label
1,581      0 no
2,955      1 yes

```

---



---

**age\_di** Age dichotomous

---

```

type: numeric (float)
label: age_di

range: [0,1]           units: 1
unique values: 2       missing .: 0/4,536

tabulation: Freq. Numeric Label
2,874      0 10 - 12 years
1,662      1 13 - 14 years

```

---



---

**aces\_cat2** ACES categorical variable

---

```

type: numeric (float)
label: aces_cat2

range: [0,4]           units: 1
unique values: 5       missing .: 102/4,536

```

---

| tabulation: | Freq. | Numeric | Label                     |
|-------------|-------|---------|---------------------------|
|             | 1,104 | 0       | No ACES                   |
|             | 985   | 1       | History of 1 ACES         |
|             | 806   | 2       | History of 2 ACES         |
|             | 541   | 3       | History of 3 ACES         |
|             | 998   | 4       | History of 4 or more ACES |
|             | 102   | .       | .                         |

---

**time\_friends\_everyday** weekly socialization with friends - everyday


---

type: numeric (float)  
label: noyes  
range: [0,1] units: 1  
unique values: 2 missing .: 1,822/4,536

| tabulation: | Freq. | Numeric | Label |
|-------------|-------|---------|-------|
|             | 1,302 | 0       | no    |
|             | 1,412 | 1       | yes   |
|             | 1,822 | .       | .     |

---

**social\_cohesion\_overall2** Social cohesion overall index


---

type: numeric (float)  
label: social\_cohesion\_overall2  
range: [0,1] units: 1  
unique values: 2 missing .: 199/4,536

| tabulation: | Freq. | Numeric | Label                |
|-------------|-------|---------|----------------------|
|             | 1,205 | 0       | low social cohesion  |
|             | 3,132 | 1       | high social cohesion |
|             | 199   | .       | .                    |

---

**voice\_tertile\_ki** 3 quantiles of meanscore\_voice


---

type: numeric (byte)  
range: [1,3] units: 1  
unique values: 3 missing .: 1,695/4,536

| tabulation: | Freq. | Value |
|-------------|-------|-------|
|             | 1,048 | 1     |
|             | 900   | 2     |
|             | 893   | 3     |
|             | 1,695 | .     |

---

**decision\_tertile\_ki** 3 quantiles of meanscore\_decision


---

type: numeric (byte)  
range: [1,3] units: 1  
unique values: 3 missing .: 1,696/4,536

| tabulation: | Freq. | Value |
|-------------|-------|-------|
|             | 977   | 1     |
|             | 1,145 | 2     |
|             | 718   | 3     |
|             | 1,696 | .     |

---

**fom\_tertile\_ki** 3 quantiles of meanscore\_fom


---

type: numeric (byte)  
range: [1,3] units: 1  
unique values: 3 missing .: 1,695/4,536

| tabulation: | Freq. | Value |
|-------------|-------|-------|
|             | 1,146 | 1     |
|             | 764   | 2     |
|             | 931   | 3     |
|             | 1,695 | .     |

---

**voice\_tertile\_bl** 3 quantiles of meanscore\_voice


---

type: numeric (byte)  
range: [1,3] units: 1  
unique values: 3 missing .: 2,861/4,536

| tabulation: | Freq. | Value |
|-------------|-------|-------|
|             | 599   | 1     |
|             | 534   | 2     |
|             | 542   | 3     |
|             | 2,861 | .     |

---

**decision\_tertile\_bl** 3 quantiles of meanscore\_decision


---

type: numeric (byte)  
range: [1,3] units: 1  
unique values: 3 missing .: 2,873/4,536

| tabulation: | Freq. | Value |
|-------------|-------|-------|
|             | 576   | 1     |
|             | 575   | 2     |
|             | 512   | 3     |
|             | 2,873 | .     |

---

**fom\_tertile\_bl** 3 quantiles of meanscore\_fom


---

type: numeric (byte)  
range: [1,3] units: 1  
unique values: 3 missing .: 2,869/4,536

| tabulation: | Freq. | Value |
|-------------|-------|-------|
|             | 586   | 1     |
|             | 593   | 2     |
|             | 488   | 3     |
|             | 2,869 | .     |

---

**friend\_sex\_combo2** Friend sex combo - excluding no friends


---

type: numeric (float)  
label: friend\_sex\_combo  
range: [1,2] units: 1  
unique values: 2 missing .: 343/4,536

| tabulation: | Freq. | Numeric | Label                    |
|-------------|-------|---------|--------------------------|
|             | 1,913 | 1       | Same-sex friends only    |
|             | 2,280 | 2       | Any opposite-sex friends |
|             | 343   | .       | .                        |

---

**ixc10\_12** violence victimization and perpetration variable


---

type: numeric (float)  
label: ixc10\_12  
range: [0,3] units: 1  
unique values: 4 missing .: 116/4,536

```

tabulation: Freq. Numeric Label
            2,726      0 no victim/perpet
            581       1 victim only
            432       2 perpetr only
            681       3 victim & perpetr
            116       .

```

---

```

sample_complete2 final analytical sample

```

---

```

type: numeric (float)
range: [0,1]          units: 1
unique values: 2      missing .: 0/4,536

```

```

tabulation: Freq. Value
            783  0
            3,753 1

```

---

```

gst_tertile_ki 3 quantiles of meanscore_gst

```

---

```

type: numeric (byte)
range: [1,2]          units: 1
unique values: 2      missing .: 1,695/4,536

```

```

tabulation: Freq. Value
            1,270  1
            1,571  2
            1,695  .

```

---

```

gst_tertile_bl 3 quantiles of meanscore_gst

```

---

```

type: numeric (byte)
range: [1,3]          units: 1
unique values: 3      missing .: 2,848/4,536

```

```

tabulation: Freq. Value
            606  1
            658  2
            424  3
            2,848 .

```

```

2 . save "/Users/akramaiya/OneDrive - Johns Hopkins/Data/Empowerment and Violence - DRC & Malawi/KI_MA_combined_PLoSMed.dta", replace
file /Users/akramaiya/OneDrive - Johns Hopkins/Data/Empowerment and Violence - DRC & Malawi/KI_MA_combined_PLoSMed.dta saved

```

```

3 . log close
   name: <unnamed>
   log: /Users/akramaiya/Dropbox/Personal Work/GEAS/GEAS Empowerment Working Group/Empowerment and Violence Perpetration & Victimization/PLOS Medicine
> /Revise and Resubmit - 3/codebook.smcl
log type: smcl
closed on: 19 Nov 2021, 16:42:07

```

---
